# Supplementary material for: Rational design of the first furoquinolinol based molecular systems for easy detection of Cu2+with potential applications in the area of membrane sensing
Source: Royal Society of Chemistry journal article supplement (doi:10.1039/c5ra21862d), 2015-01-01
Supplement: c5ra21862d1.pdf [file c5ra21862d1.pdf]

## **Electronic Supporting Information**

### **Rational designing of first furoquinolinol based molecular systems for easy detection of Cu<sup>2+</sup> with potential applications in the area of membrane sensing**

Manoj Kumar,<sup>a,‡</sup> Lokesh Kumar Kumawat,<sup>a,‡</sup> Vinod Kumar Gupta<sup>a,b</sup> and Anuj Sharma<sup>a,\*</sup>

<sup>a</sup>*Department of Chemistry, Indian Institute of Technology Roorkee, Roorkee-247667, India*

<sup>b</sup>*Department of Applied Chemistry, University of Johannesburg, Johannesburg, South-Africa*

*\*Corresponding author*

*Phone: +9113 3228 4751*

*Fax: +9113 3227 3560*

*e-mail: [anujsharma.mcl@gmail.com](mailto:anujsharma.mcl@gmail.com), [anujsfcy@iitr.ac.in](mailto:anujsfcy@iitr.ac.in)*

*‡Contributed equally as co-first authors.*

|                               |        |
|-------------------------------|--------|
| Title Page.....               | S1     |
| Content Page.....             | S2     |
| Analytical data.....          | S3     |
| Spectra, Figures, Tables..... | S4-S30 |

## Analytical data

### **3-(4-bromophenyl)-2-((2-morpholinoethyl)amino)furo[3,2-*c*]quinolin-4-ol (FQ1).**

Yellow solid (81%), mp (decomp.) = 258-259°C, IR (KBr, cm<sup>-1</sup>):  $\nu_{\max}$  = 3369, 2963, 2864, 2821, 1655, 1602, 1498. <sup>1</sup>H NMR (400 MHz, CDCl<sub>3</sub>):  $\delta_{\text{H}}$  = 2.47 (br s, 4H), 2.61 (br s, 2H), 3.48 (br s, 2H), 3.66 (br s, 4H), 5.26 (br s, 1H), 7.21–7.29 (m, 3H)\*, 7.38 (td, 1H,  $J$  = 7.3 & 1.2 Hz), 7.54 (s, 4H), 7.82 (d, 1H,  $J$  = 7.8 Hz), 10.49 (s, 1H). <sup>13</sup>C NMR (100 MHz, CDCl<sub>3</sub>):  $\delta_{\text{C}}$  = 37.2, 48.5, 52.8, 62.2, 89.9, 103.3, 106.0, 115.1, 117.7, 120.0, 123.6, 125.9, 126.6, 128.5, 130.4, 141.0, 155.0, 155.4, 160.8. HRMS (ESI)  $m/z$  calcd. for C<sub>23</sub>H<sub>22</sub>BrN<sub>3</sub>O<sub>3</sub> [M-H]<sup>+</sup> : 466.0760, found: 466.0765.

### **3-(4-chlorophenyl)-2-(pentylamino)furo[3,2-*c*]quinolin-4-ol (FQ2).**

Yellow solid (78%), mp = 218-220 °C, IR (KBr, cm<sup>-1</sup>):  $\nu_{\max}$  = 2827, 1661, 1606, 1500, 1416. <sup>1</sup>H NMR (400 MHz, CDCl<sub>3</sub>):  $\delta_{\text{H}}$  = 0.87–0.94 (m, 3H), 1.36 (m, 4H), 1.64 (quint, 2H,  $J$  = 7.2 Hz), 3.39 (t, 2H,  $J$  = 7.1 Hz), 4.38 (br s, 1H), 7.14–7.26 (m, 2H)\*, 7.32 (m, 2H), 7.39 (d, 2H,  $J$  = 8.5), 7.58 (dt, 2H,  $J$  = 8.5 & 1.8 Hz), 7.82 (d, 1H,  $J$  = 7.8 Hz), 11.17 (s, 1H). <sup>13</sup>C NMR (100 MHz, CDCl<sub>3</sub>):  $\delta_{\text{C}}$  = 14.0, 22.9, 29.2, 29.8, 42.6, 94.6, 107.9, 110.7, 122.4, 124.6, 128.2, 129.9, 130.4, 130.9, 131.3, 133.0, 145.7, 159.6, 160.1, 165.4. HRMS (ESI)  $m/z$  calcd. for C<sub>22</sub>H<sub>21</sub>ClN<sub>2</sub>O<sub>2</sub>[M+H]<sup>+</sup> : 379.1207, found: 379.1207.

\* Solvent peak at 7.26 is overlapped with this peaks, hence higher integration is obtained.

See <sup>1</sup>H NMR spectra of both compounds at page S4 and S7 of ESI.

Figure SS1: 3-(4-bromophenyl)-2-((2-morpholinoethyl)amino)furo[3,2-c]quinolin-4-ol (FQ1): <sup>1</sup>H NMR

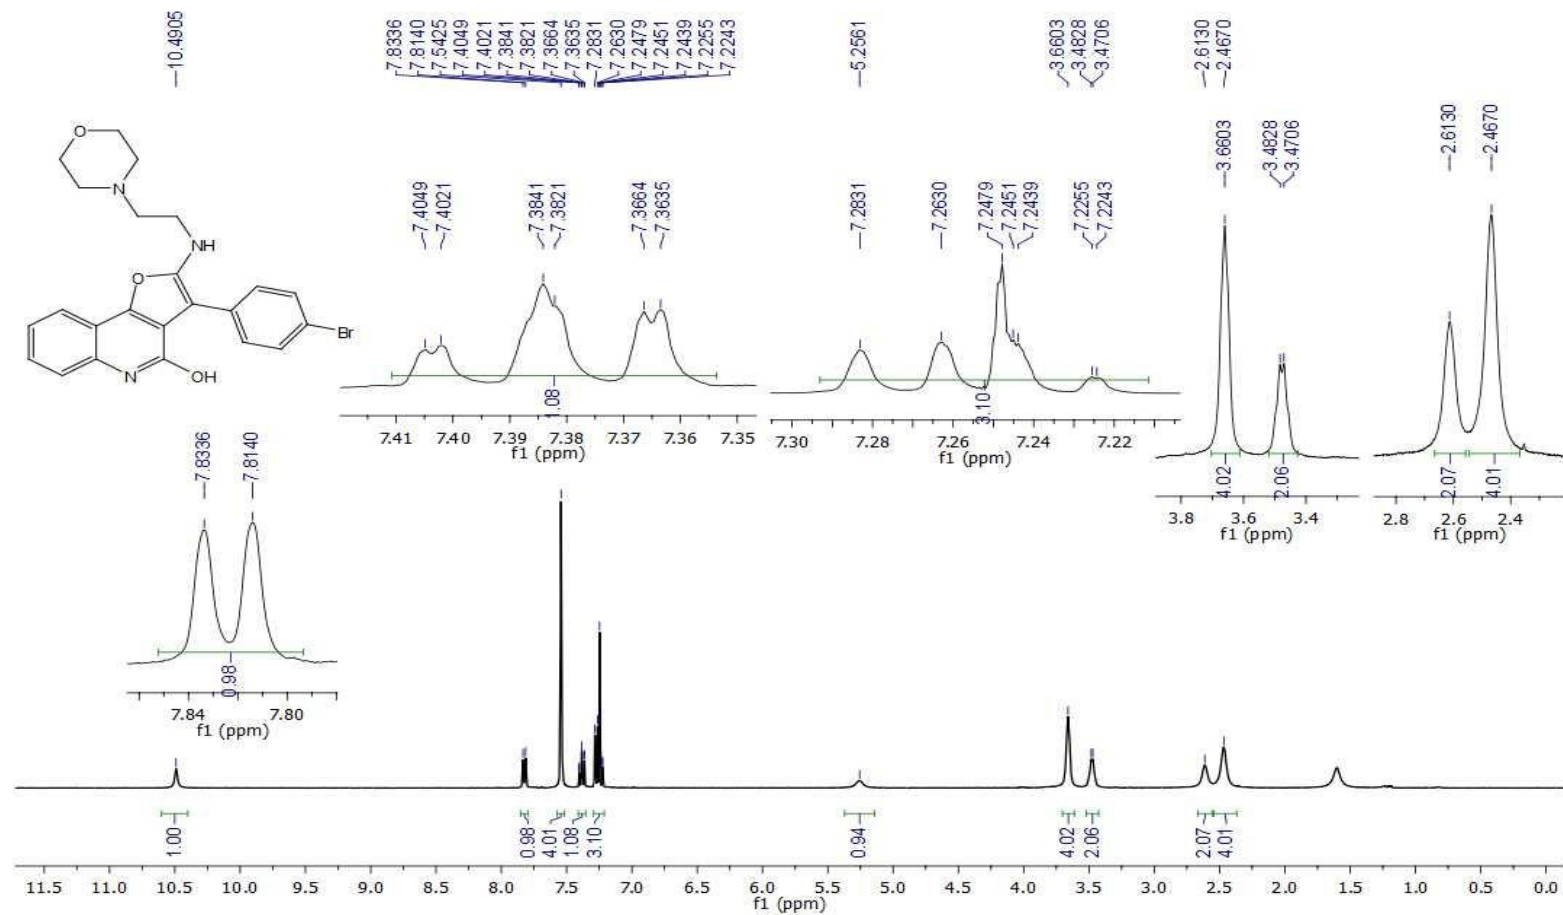

Figure S52: 3-(4-bromophenyl)-2-((2-morpholinoethyl)amino)furo[3,2-c]quinolin-4-ol (FQ1): <sup>13</sup>C NMR

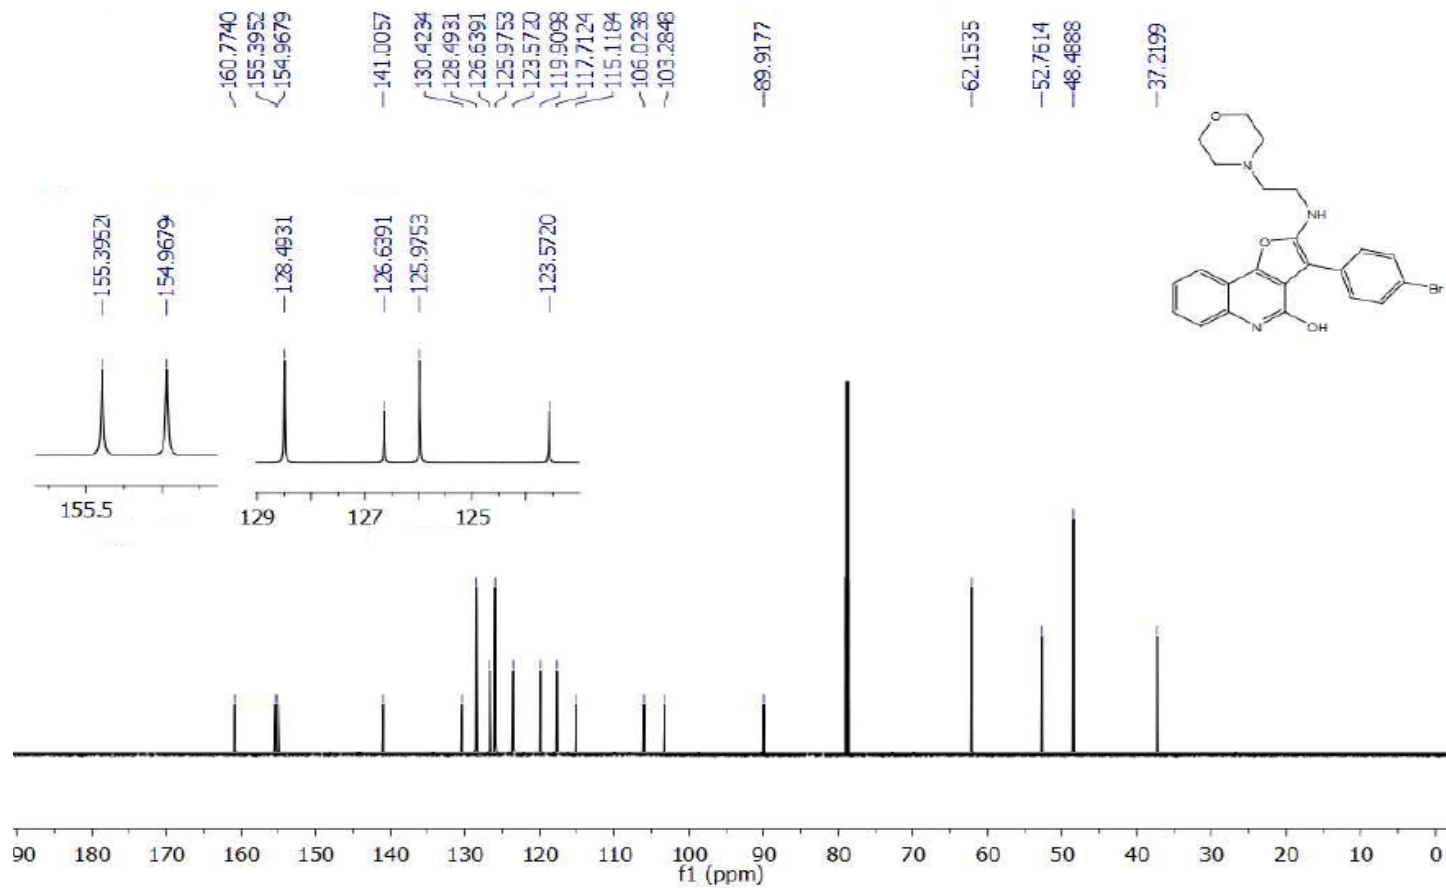

Figure SS3: 3-(4-bromophenyl)-2-((2-morpholinoethyl)amino)furo[3,2-c]quinolin-4-ol (FQ1): HRMS

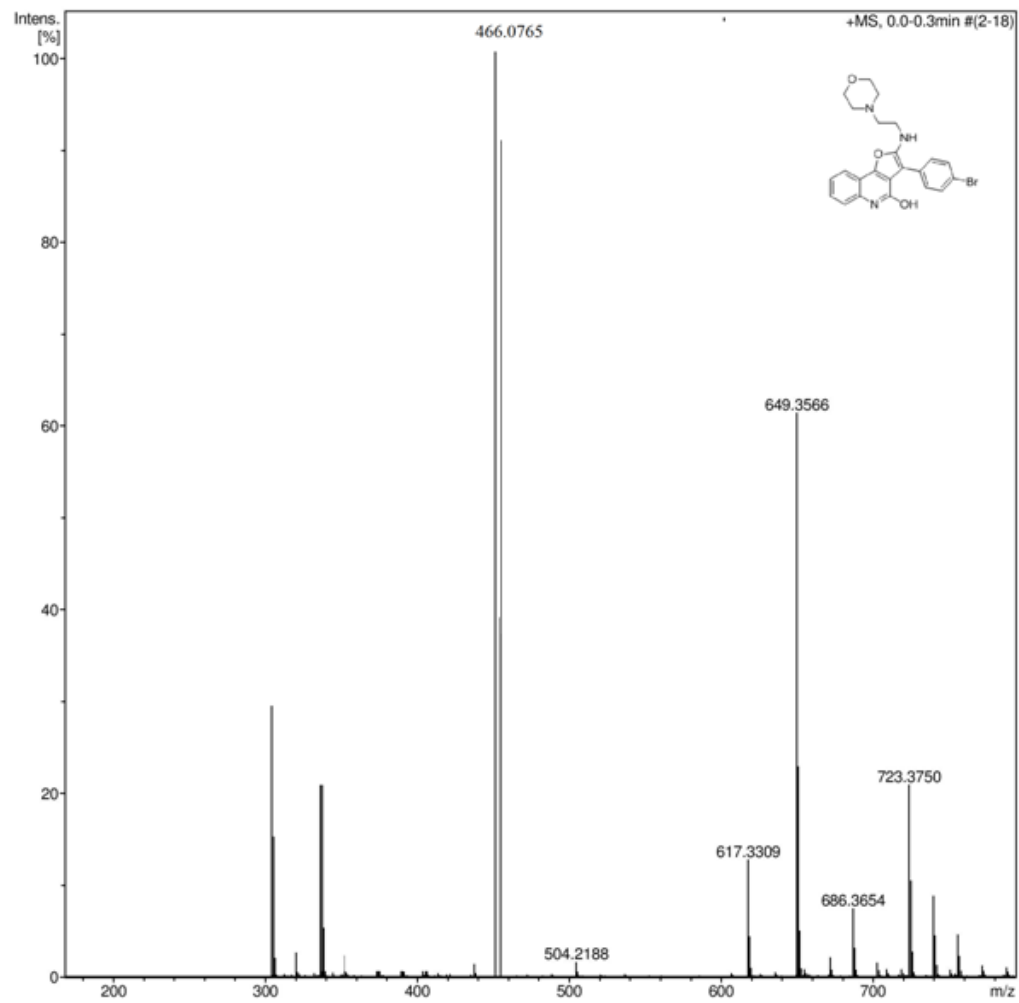

Figure SS4: 3-(4-chlorophenyl)-2-(pentylamino)furo[3,2-c]quinolin-4-ol (FQ2): <sup>1</sup>H NMR

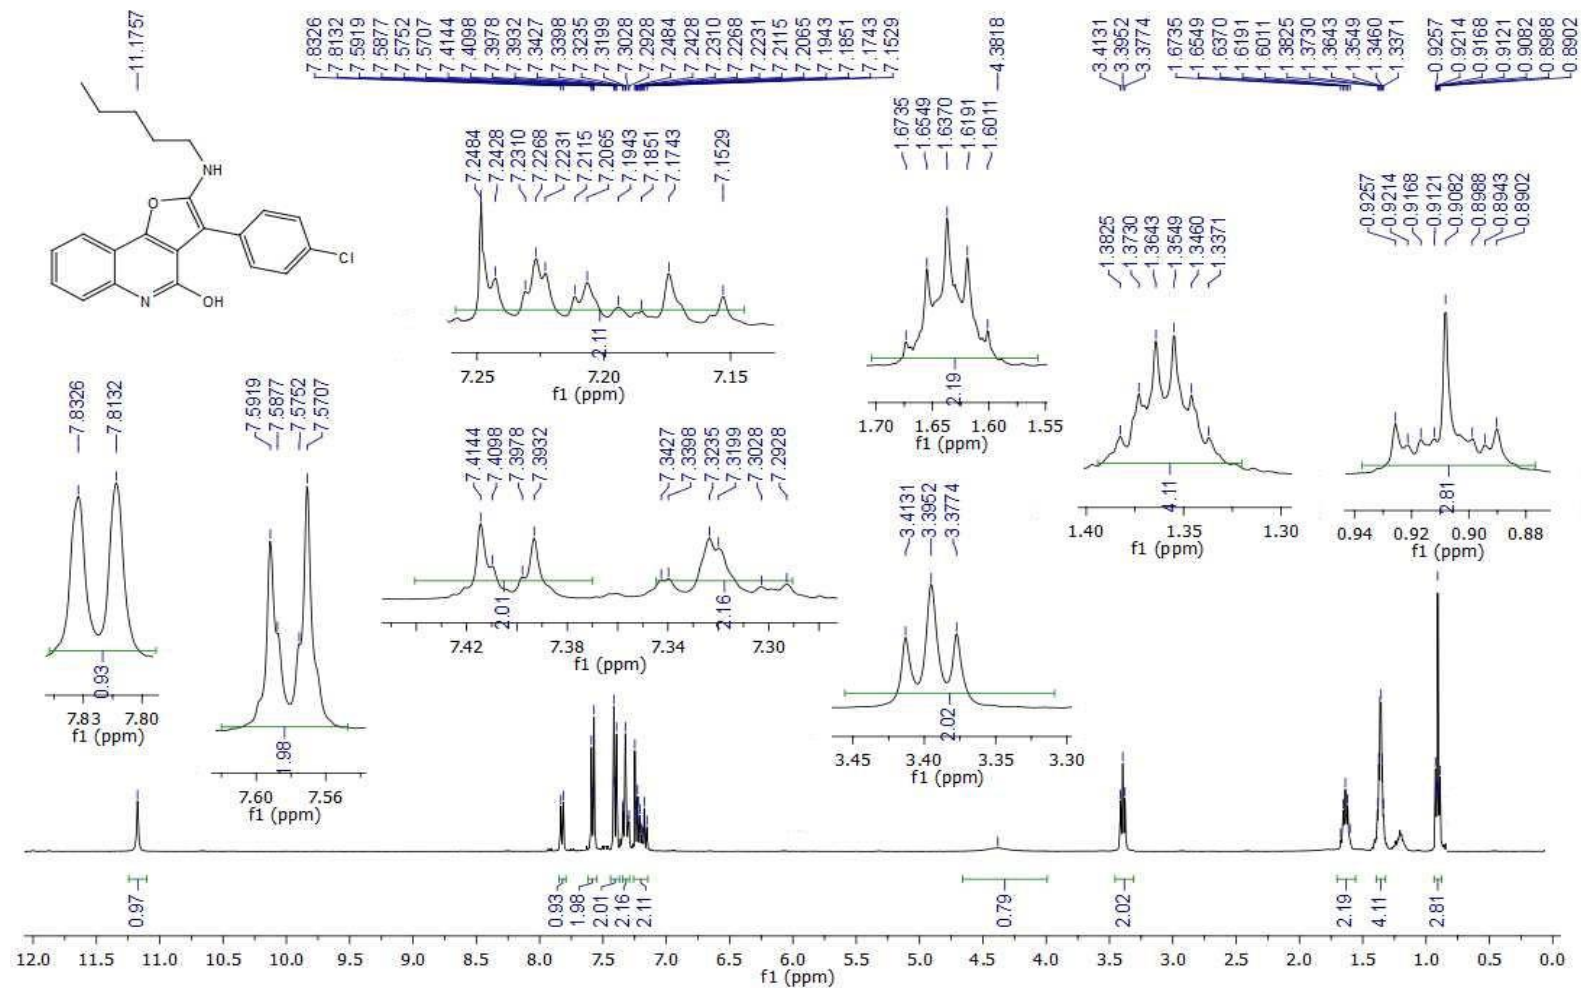

Figure S5: 3-(4-chlorophenyl)-2-(pentylamino)furo[3,2-c]quinolin-4-ol (FQ2):  $^{13}\text{C}$  NMR

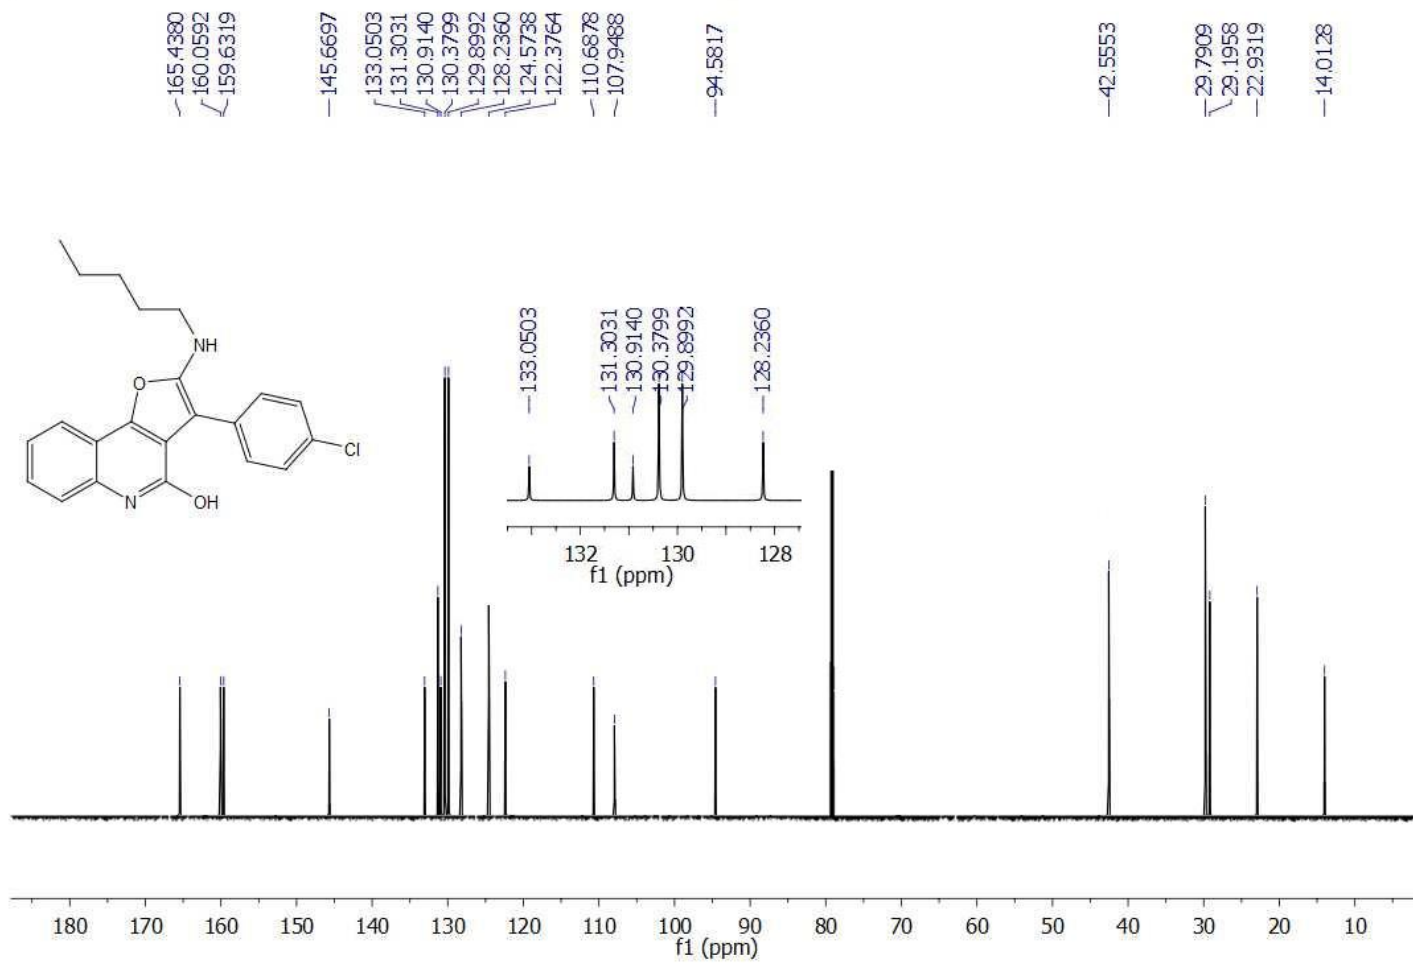



Figure SS6: 3-(4-chlorophenyl)-2-(pentylamino)furo[3,2-c]quinolin-4-ol (FQ2): HRMS

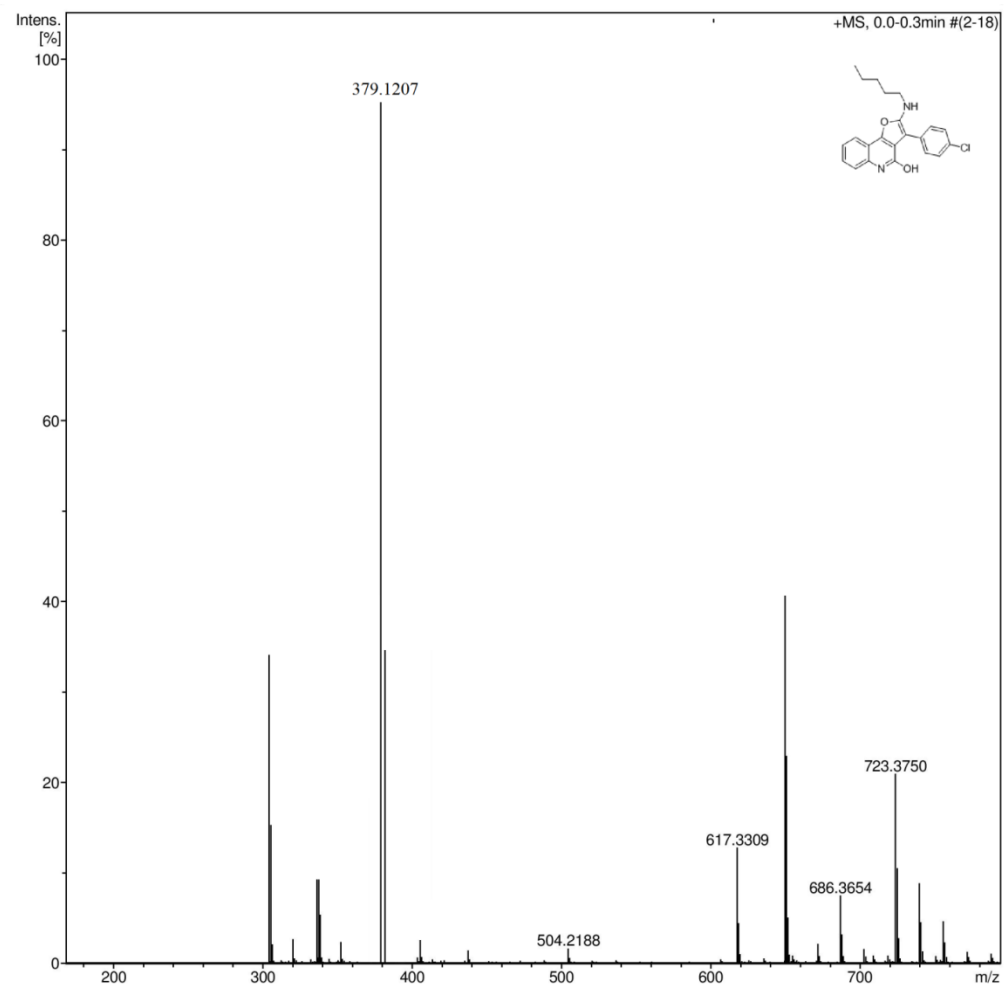

**Figure SS7: UV-Vis Spectra of FQ1 (20 $\mu$ M in DMSO:MeOH = 1:9) in the presence of different ions (10 equiv.). The distinct behaviour of Cu<sup>2+</sup> (equimolar) is apparent from figure.**

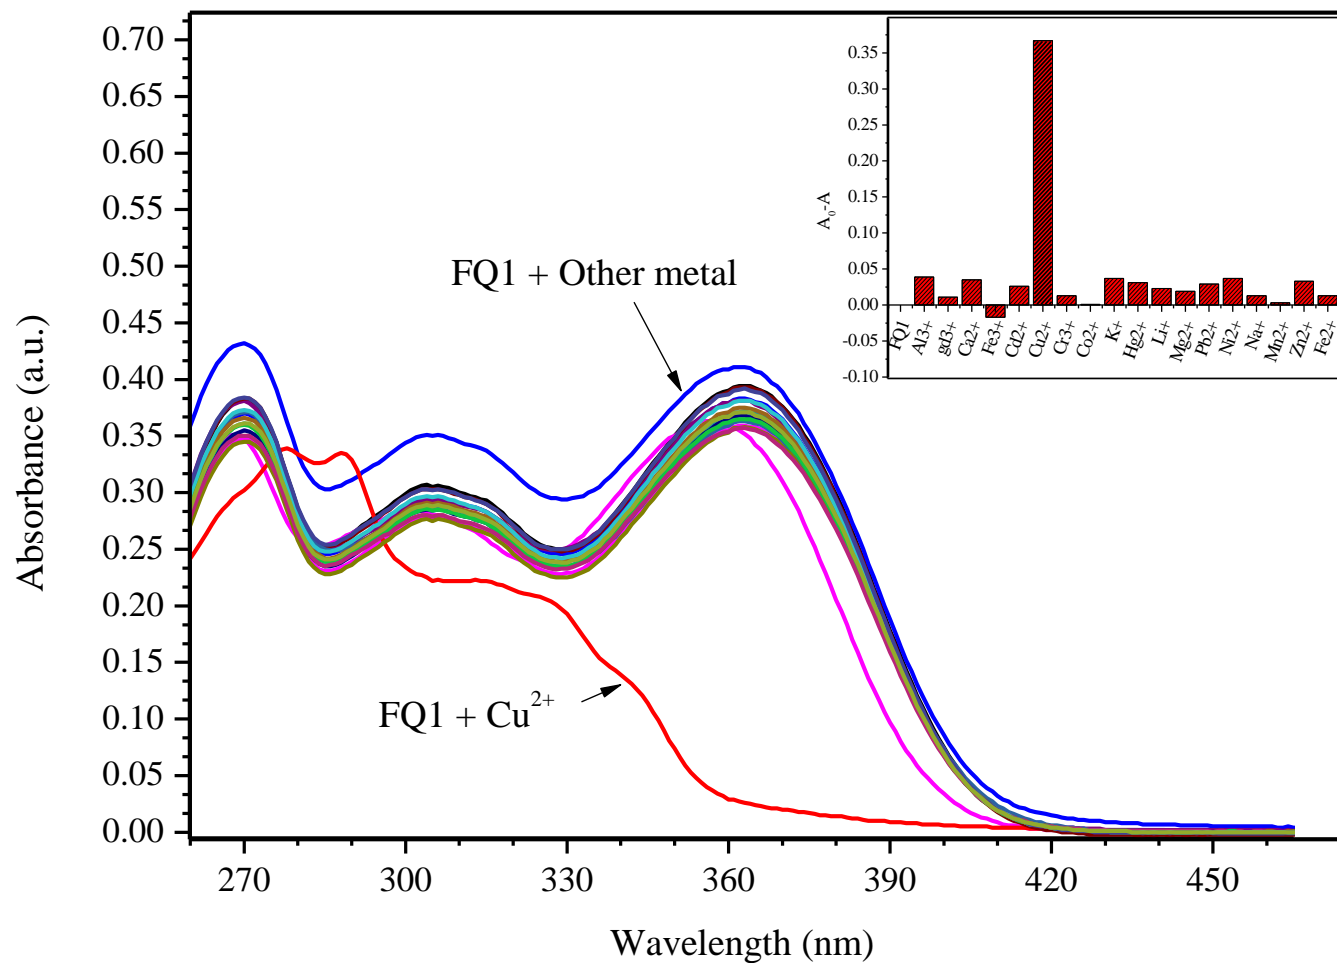

Figure SS8: UV-vis Spectra of FQ2 (20 $\mu$ M in DMSO:MeOH = 1: 9) in the presence of different ions (10 equiv.). The distinct behaviour of Cu<sup>2+</sup> (equimolar) is apparent from figure.

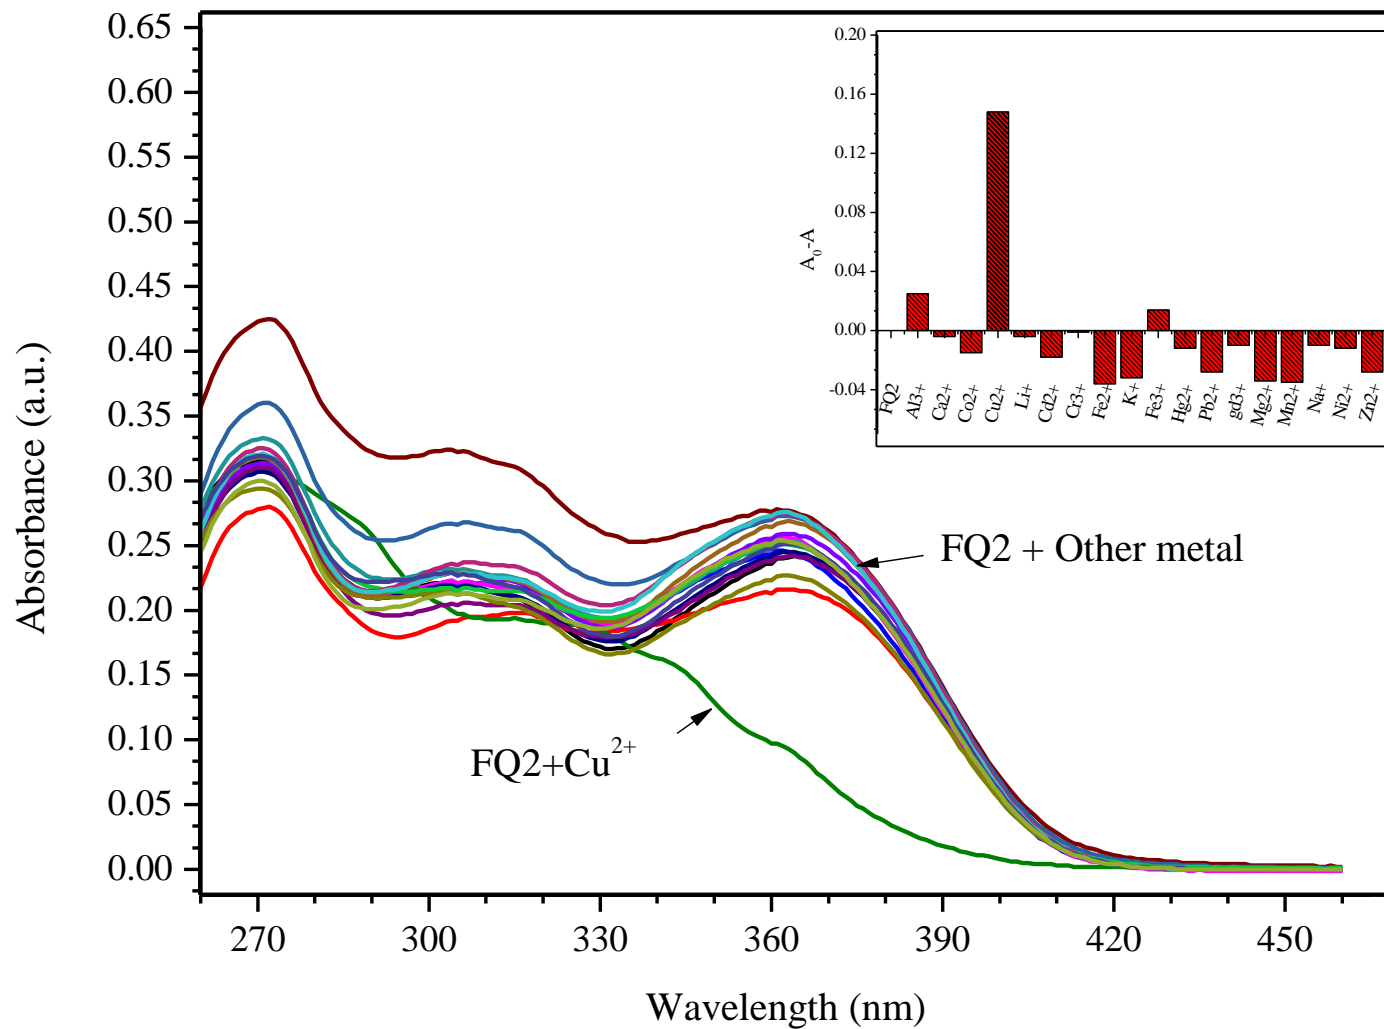

**Figure SS9: Fluorescence response of FQ1 (20 $\mu$ M in DMSO:MeOH = 1: 9) toward 10 equiv. of different metal ions after excitation at 370 nm.**

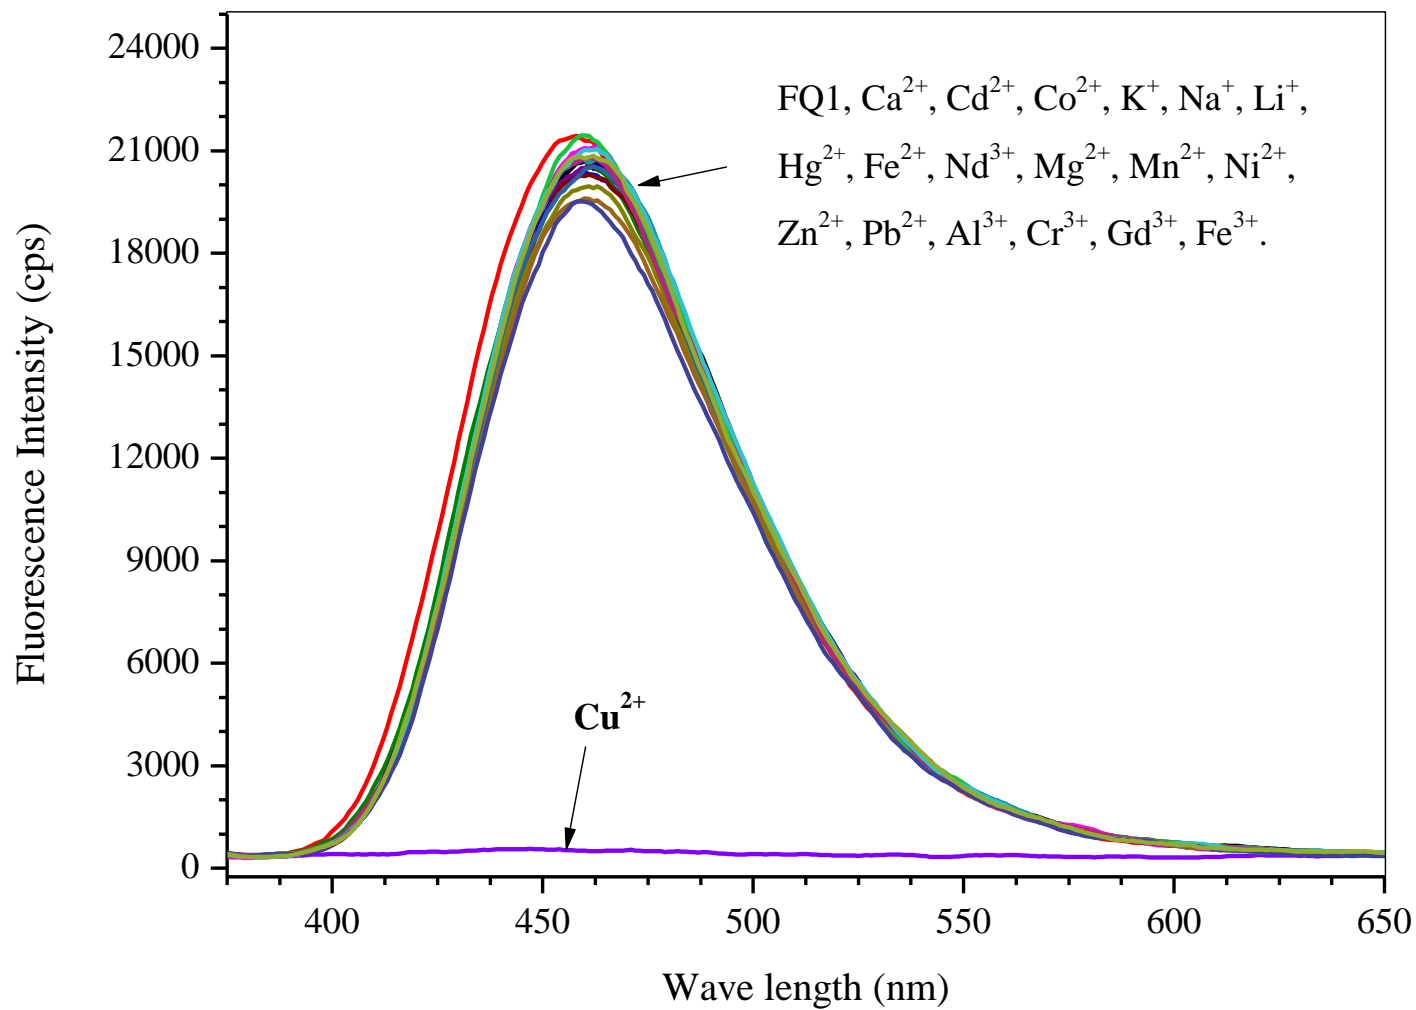

**Figure SS10: Fluorescence response of FQ1 (20 $\mu$ M in DMSO:MeOH = 1: 9) toward 10 equiv. different metal ions after excitation at 370 nm wavelength.**

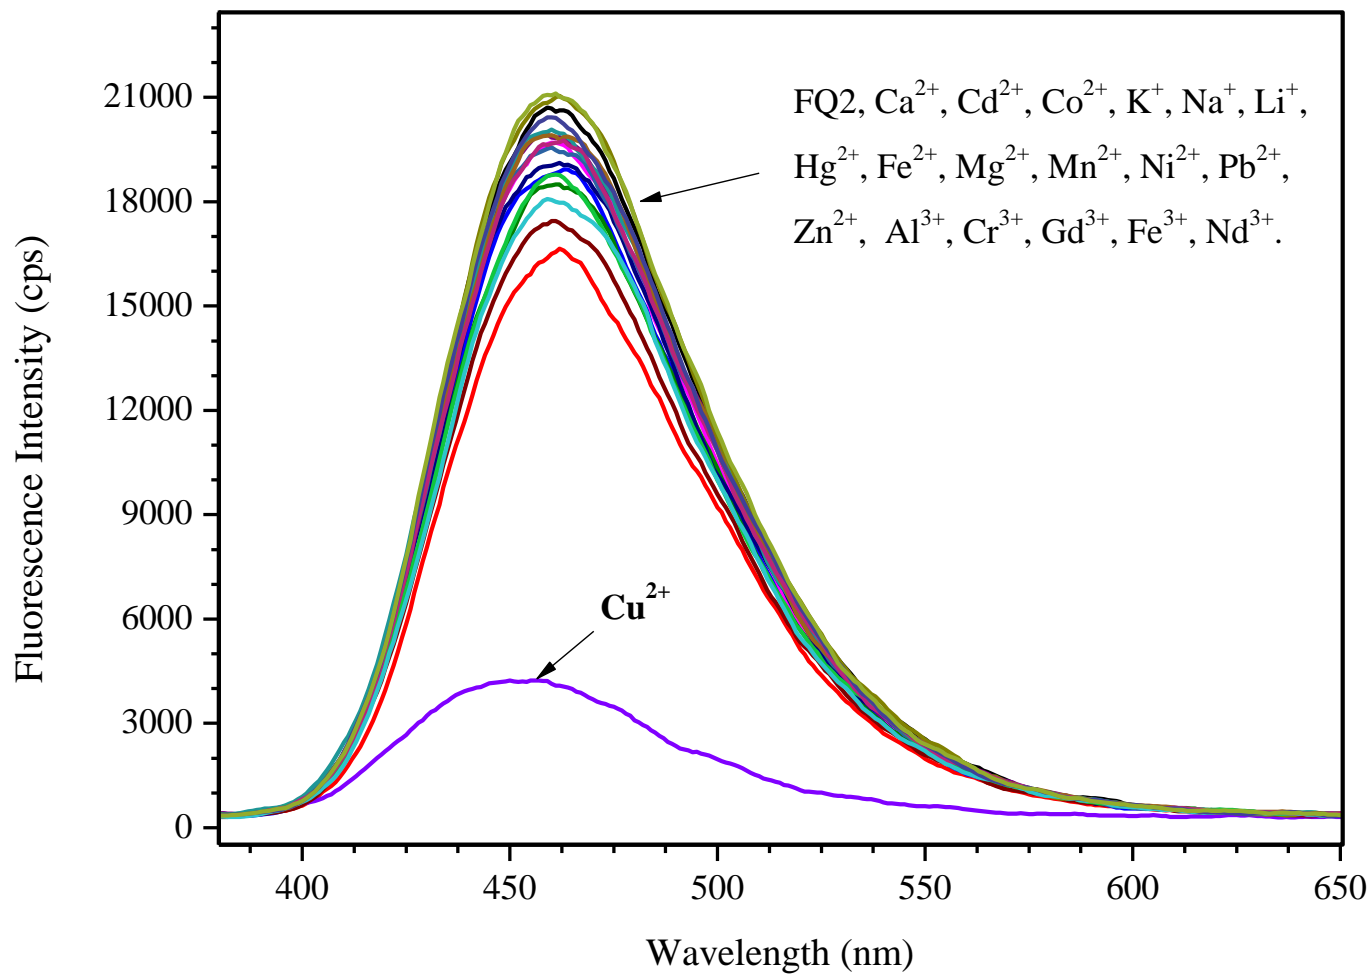

Figure SS11: Fluorescence responses of FQ1 (20 $\mu$ M in DMSO:MeOH = 1:9) in the presence of different metal ions.

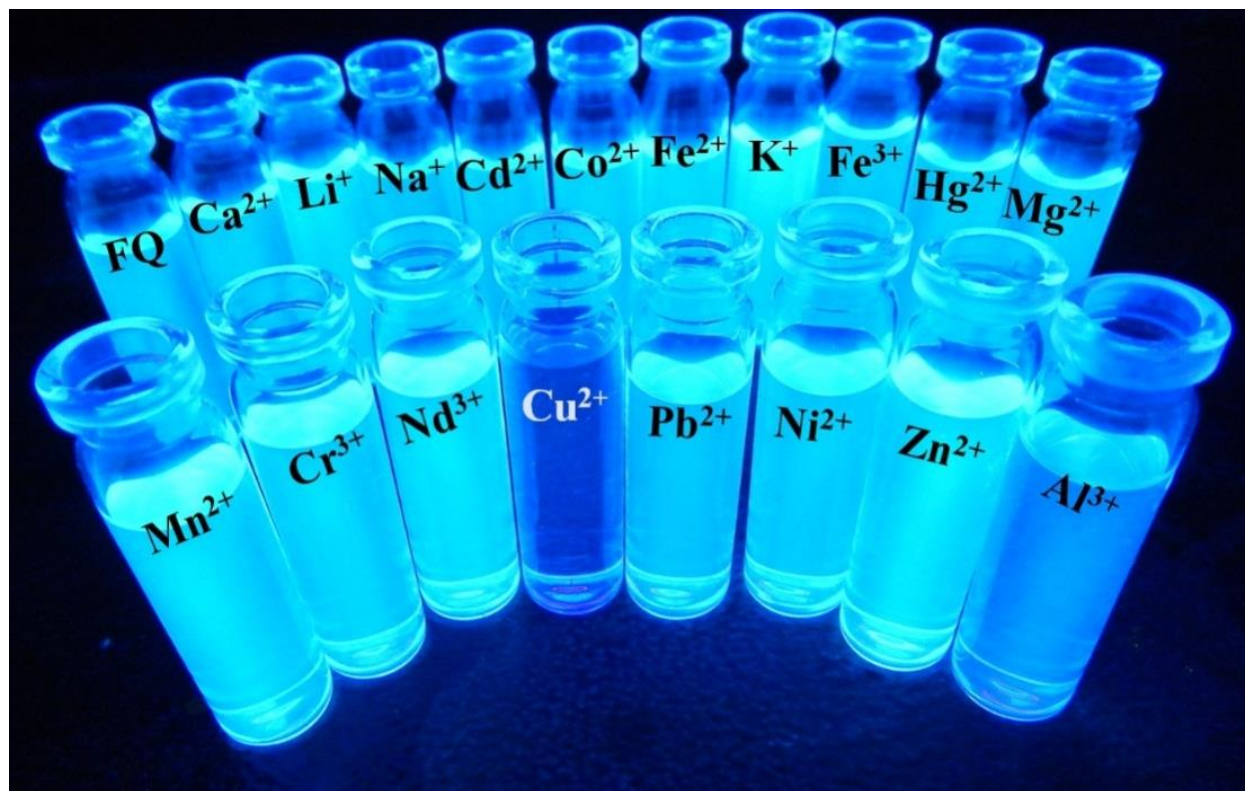

Figure SS12: Fluorescent titration of FQ1 (20  $\mu\text{M}$  in DMSO:MeOH = 1:9) against  $\text{Cu}^{2+}$  (0.1 equiv. to 2.5 equiv.) after excitation at 370 nm wavelength.

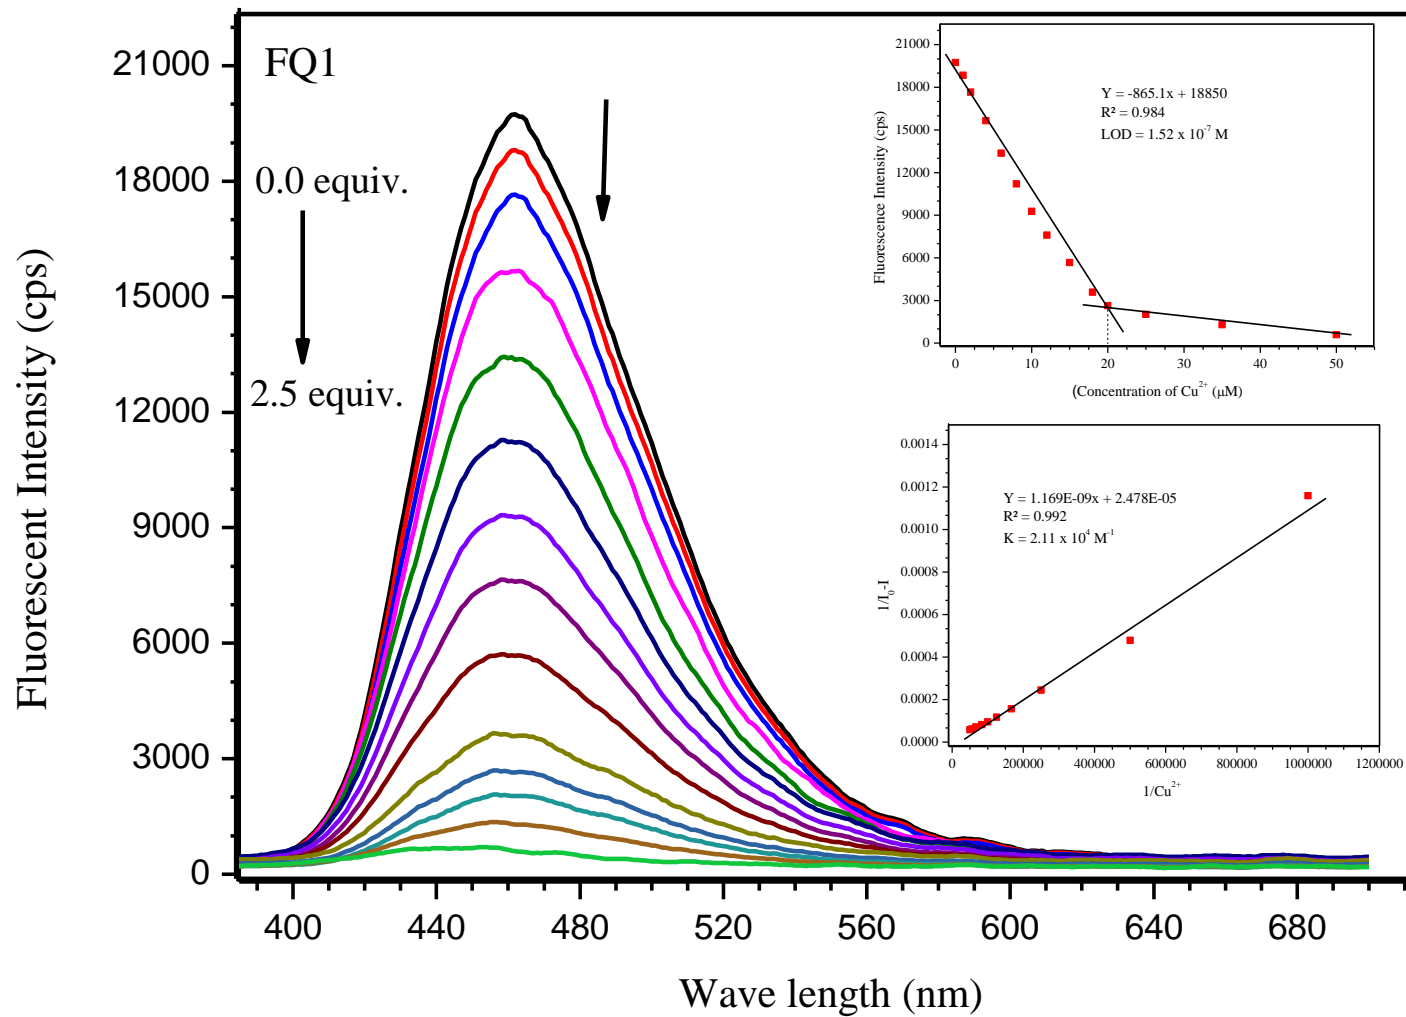

**Figure SS13: Fluorescent titration of FQ2 (20  $\mu\text{M}$  in DMSO:MeOH = 1:9) against  $\text{Cu}^{2+}$  (0.1 equiv. to 2.5 equiv.) after excitation at 370 nm wavelength.**

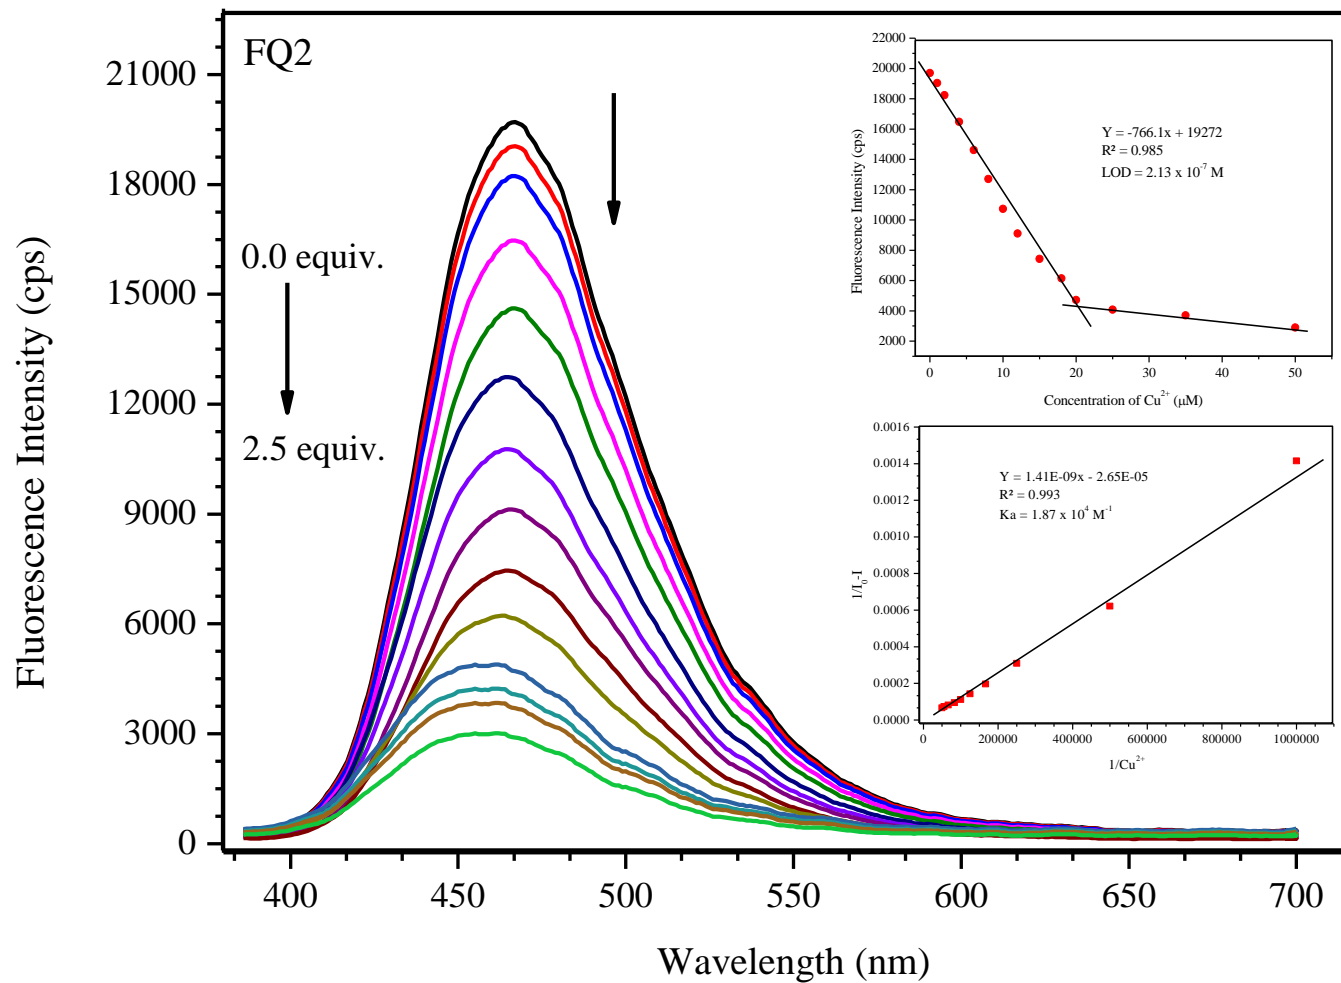



Figure SS14: Examination of selectivity of FQ1 (20  $\mu$ M in DMSO:MeOH = 1:9) towards  $\text{Cu}^{2+}$  in the presence of interfering ions.

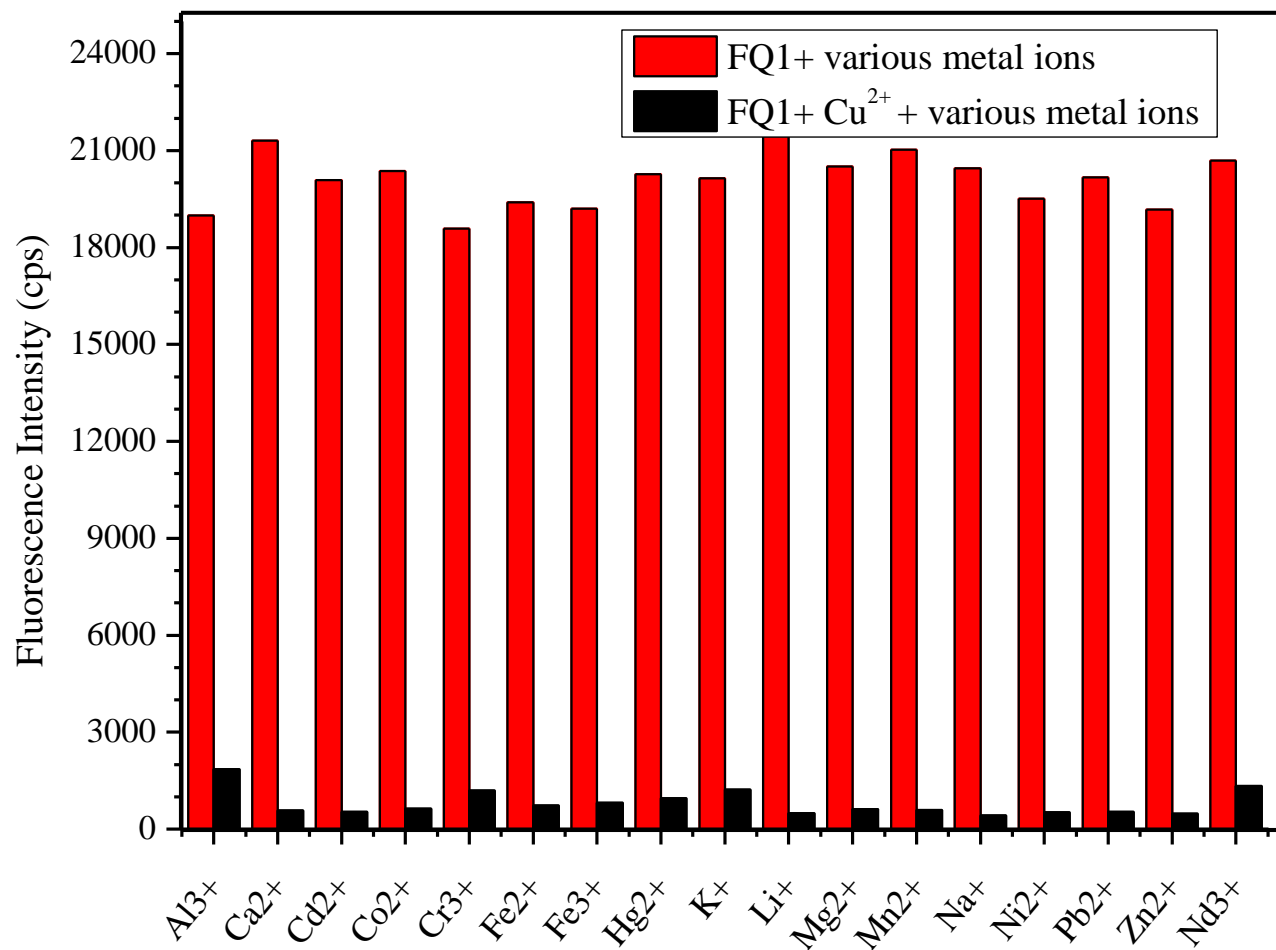

Figure SS 15: Examination of selectivity of FQ2 (20  $\mu$ M in DMSO:MeOH = 1:9) towards  $\text{Cu}^{2+}$  in the presence of interfering ions.

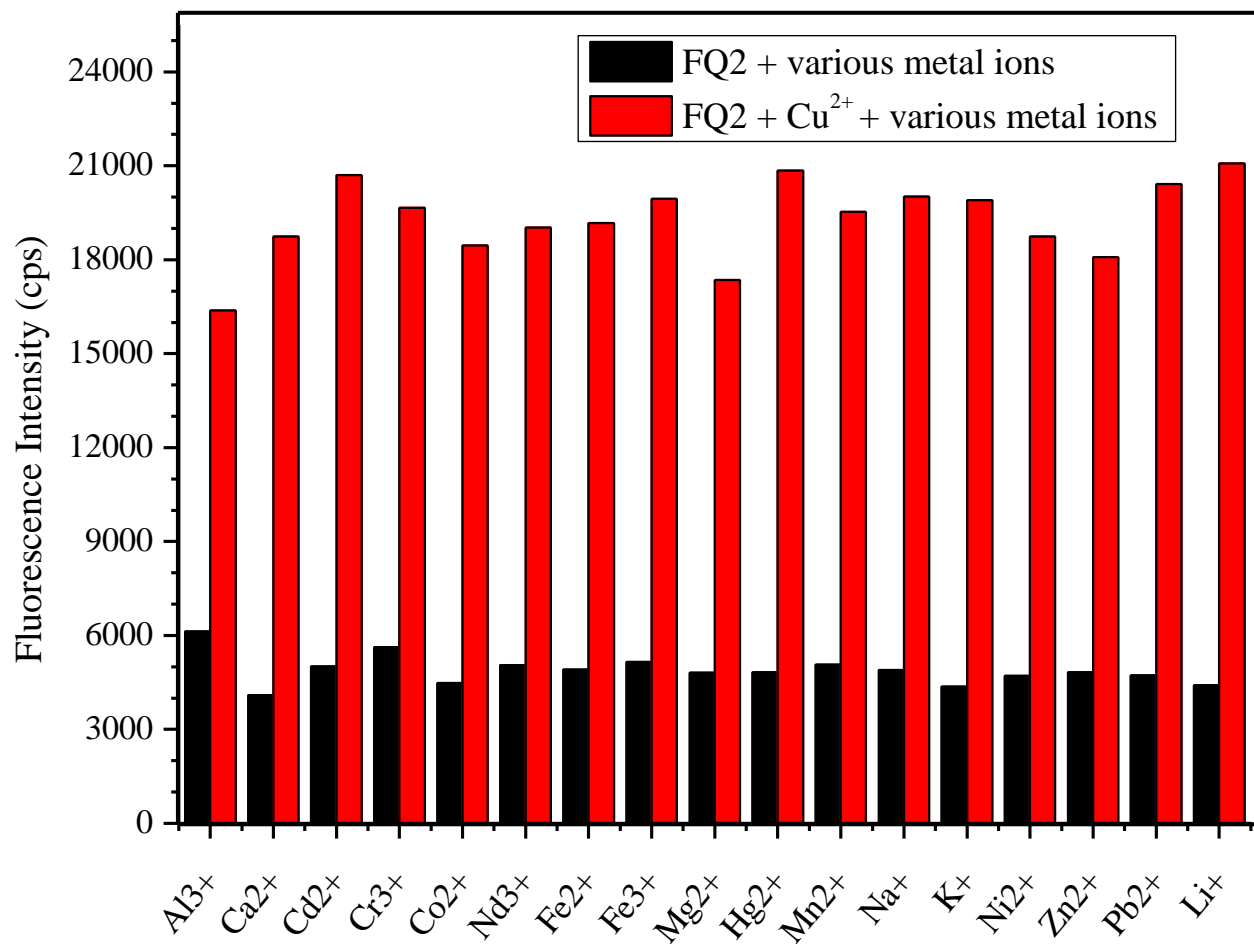

Figure SS16: Change in fluorescence response with time at 465 and 460 nm respectively for compounds FQ1 and FQ2.

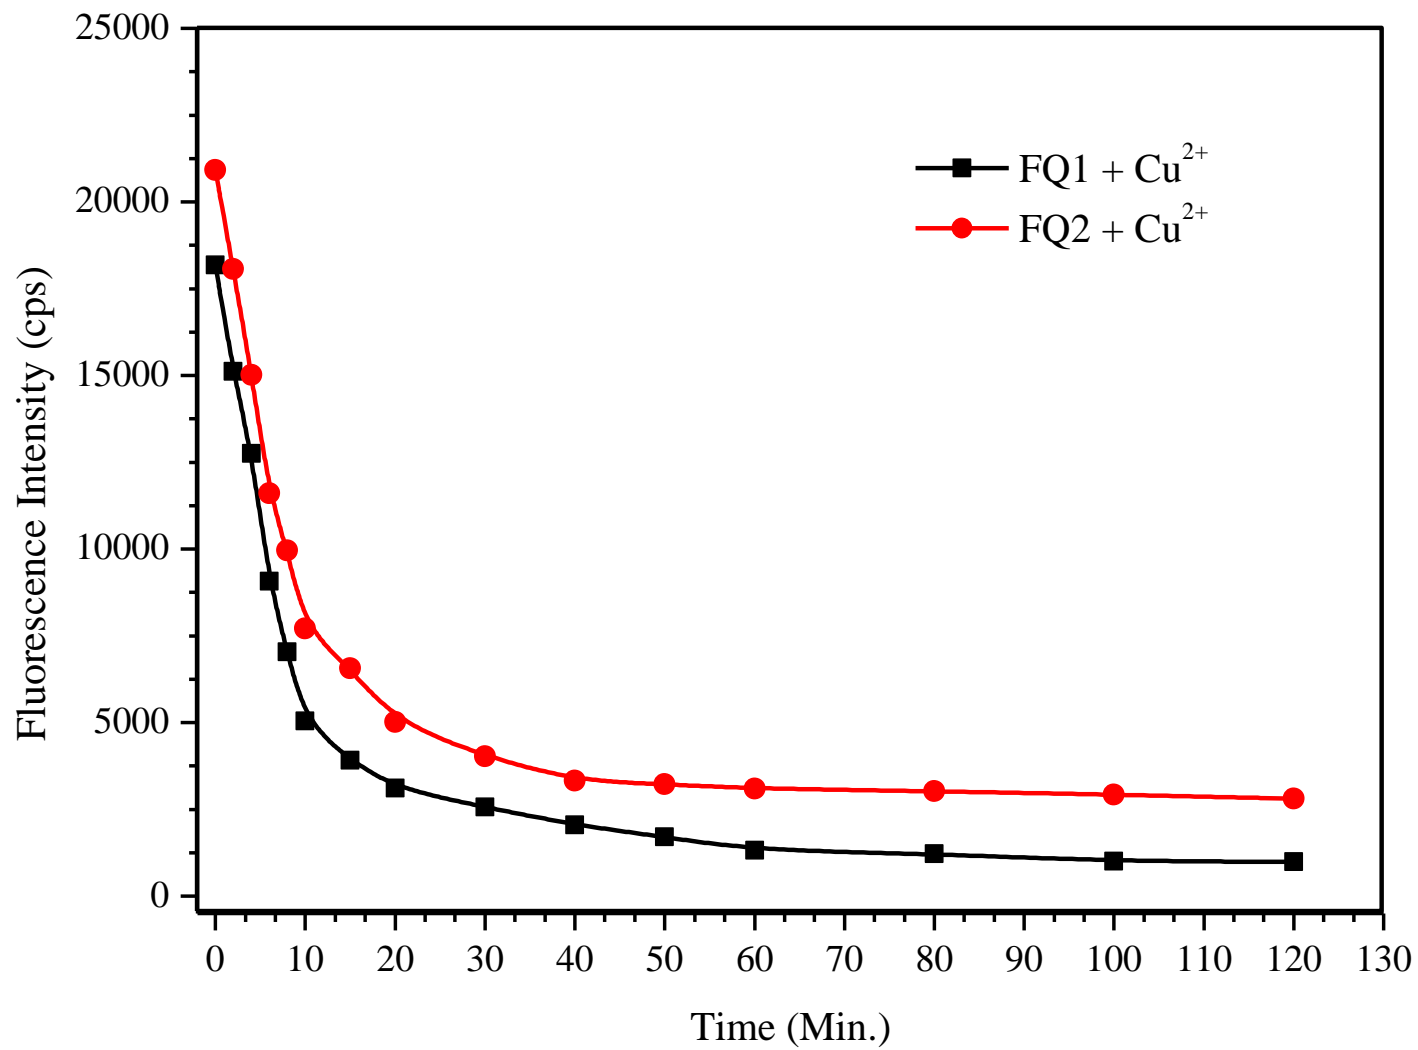

Figure SS17: Job's plot to determine binding stoichiometry of compounds FQ1 with  $\text{Cu}^{2+}$

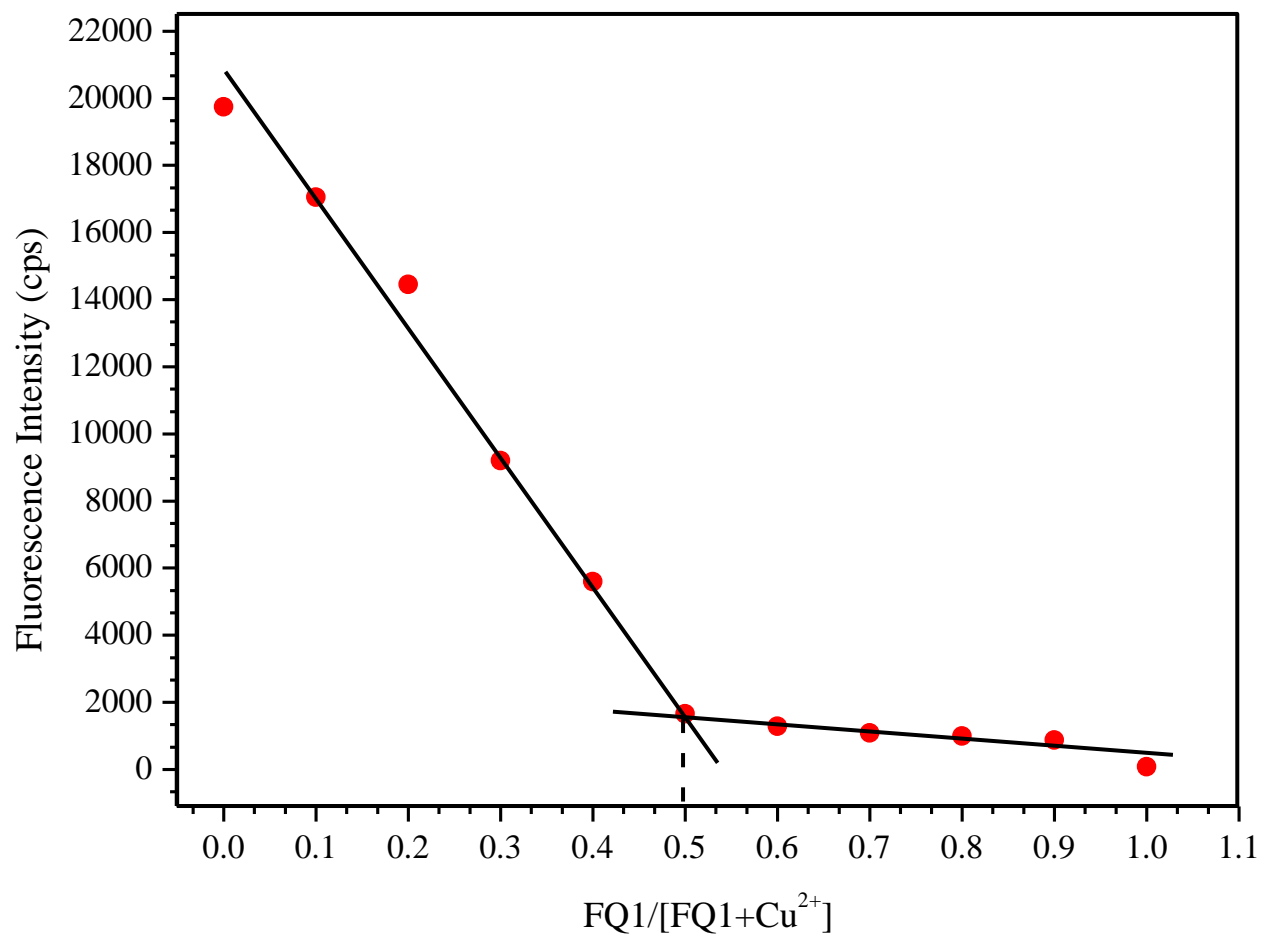

Figure SS18: Job's plot to determine binding stoichiometry of compounds FQ2 with  $\text{Cu}^{2+}$

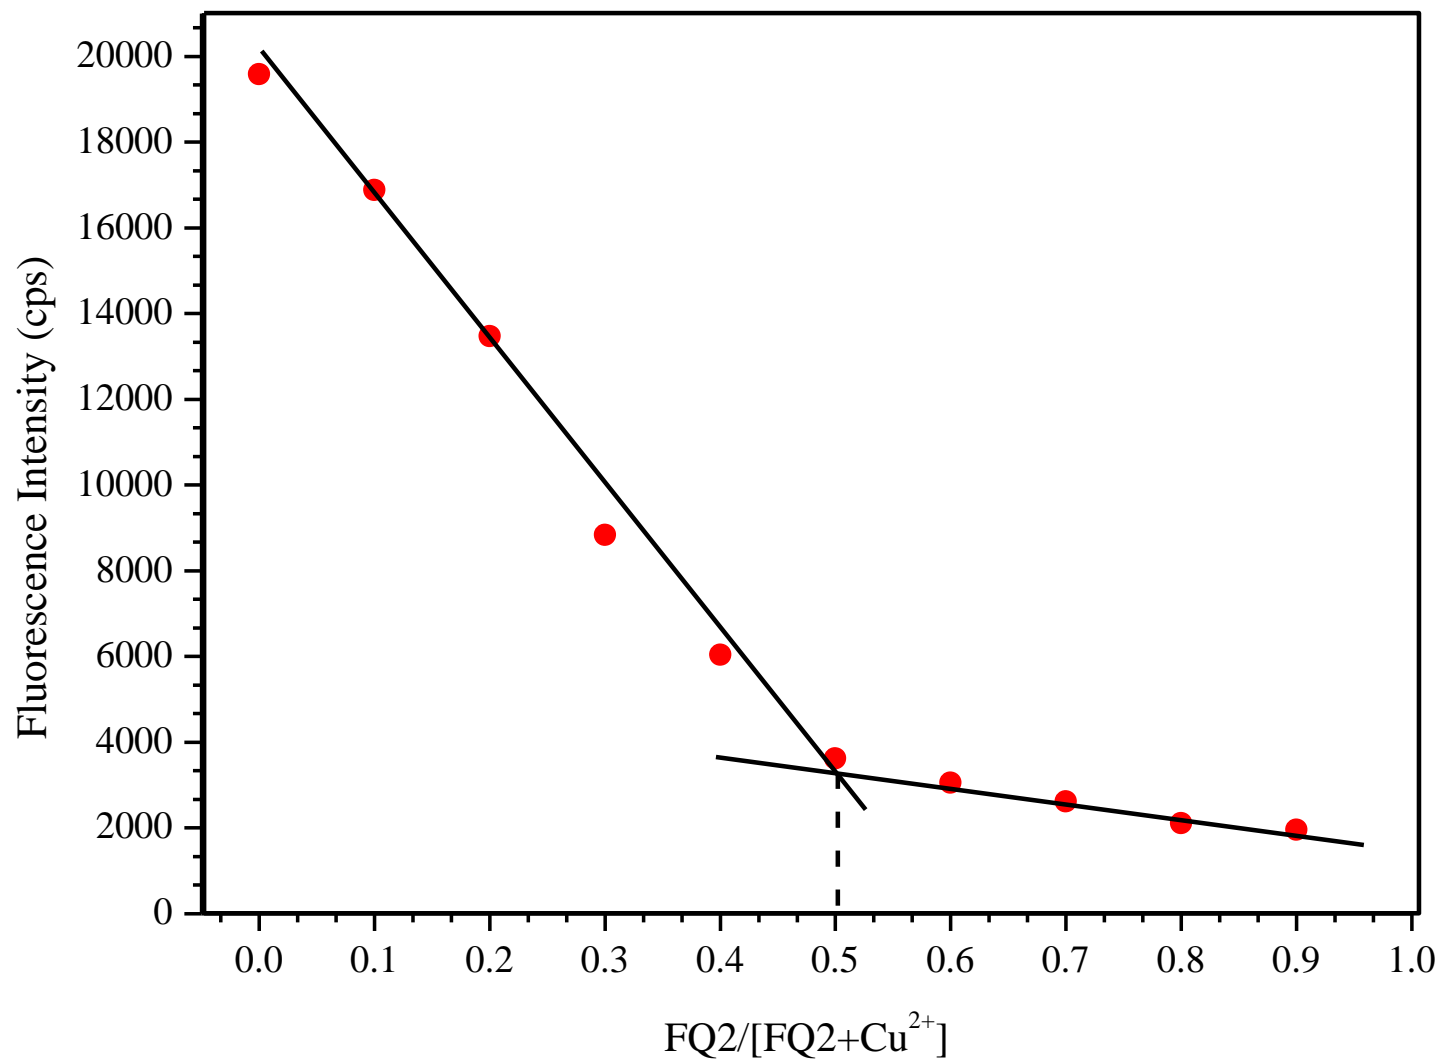

Figure SS19: HRMS of possible complex of compound FQ1 with Cu<sup>2+</sup>

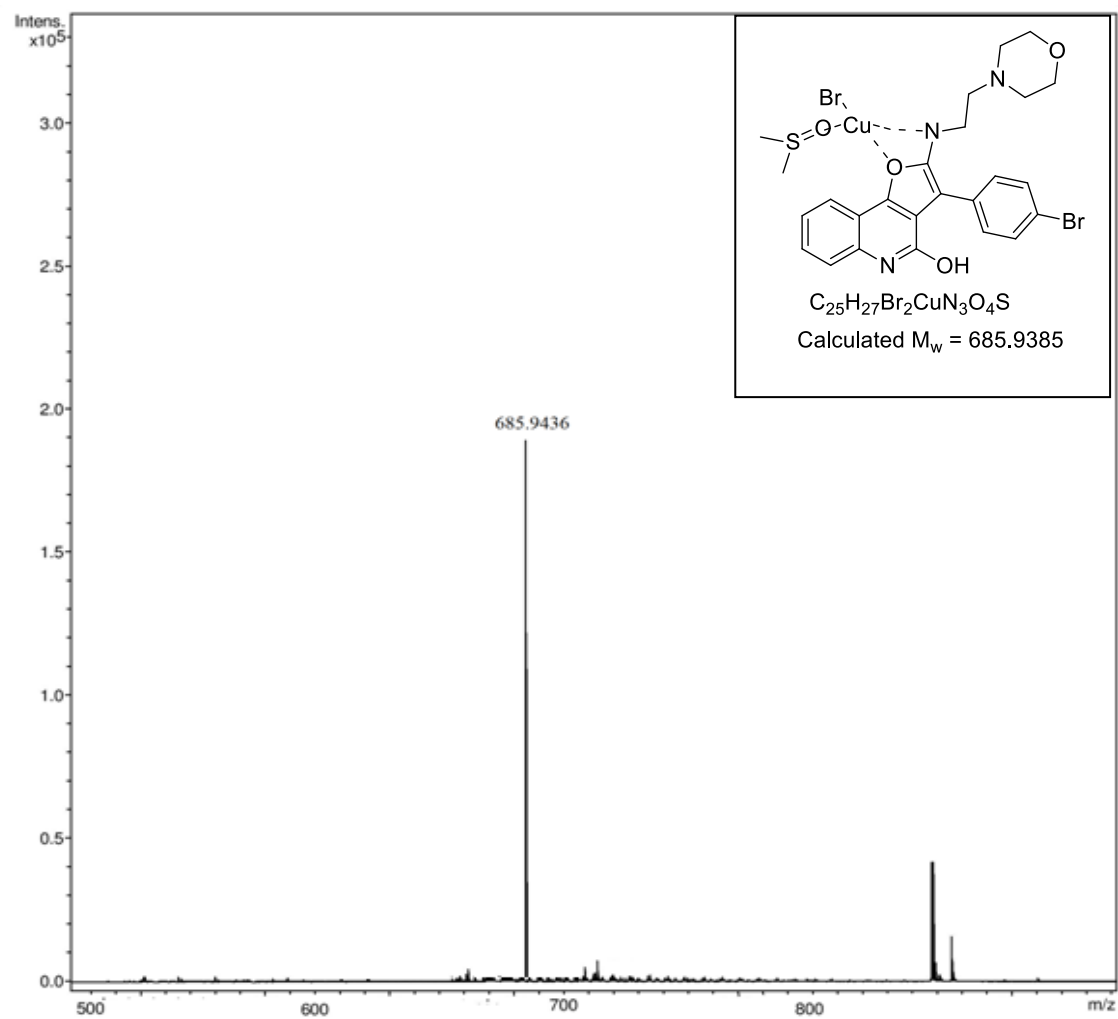

Figure SS20: HRMS of possible complex of compound FQ2 with Cu<sup>2+</sup>

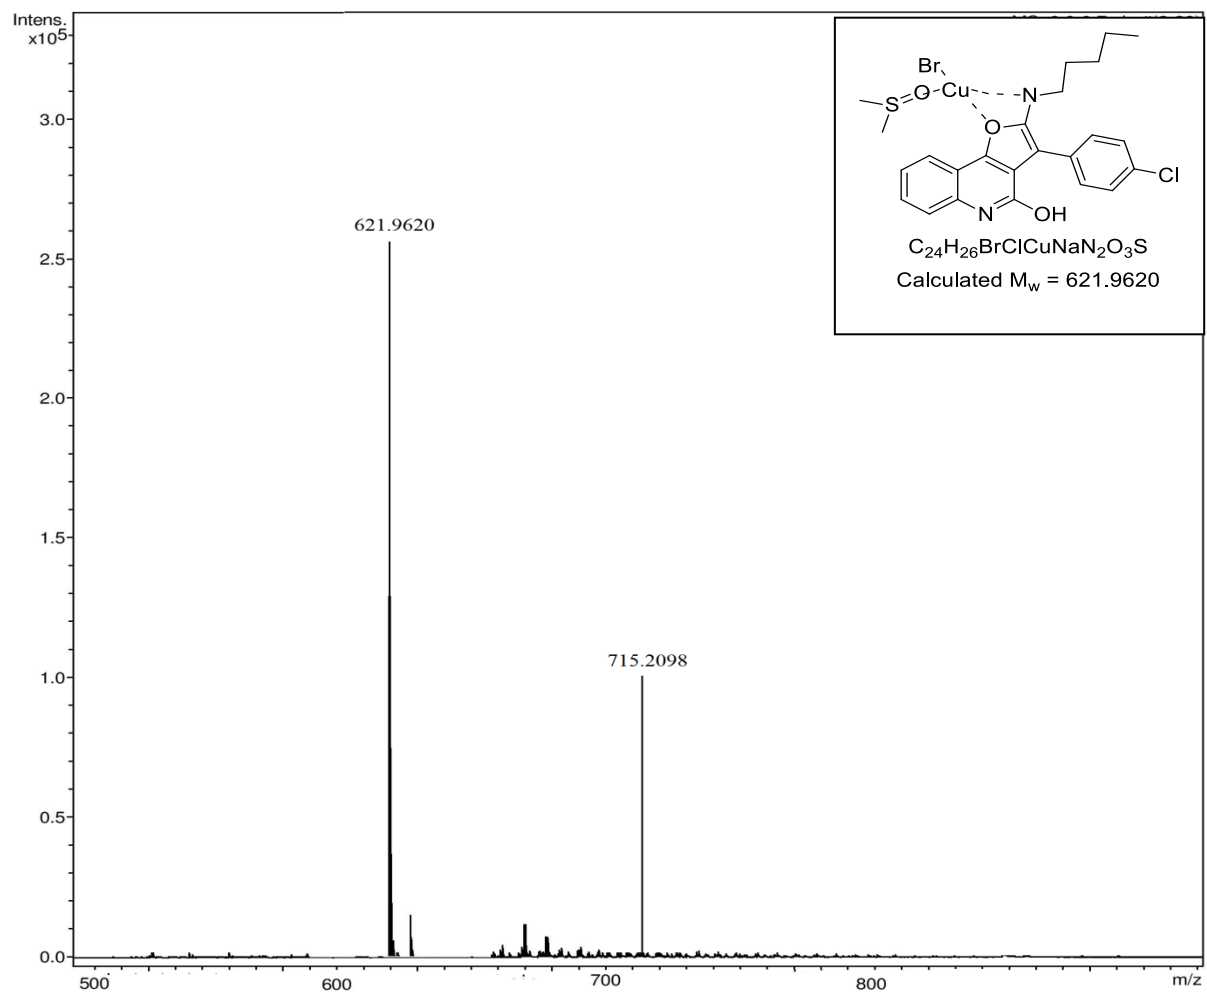

Figure SS21: Reversibility Studies

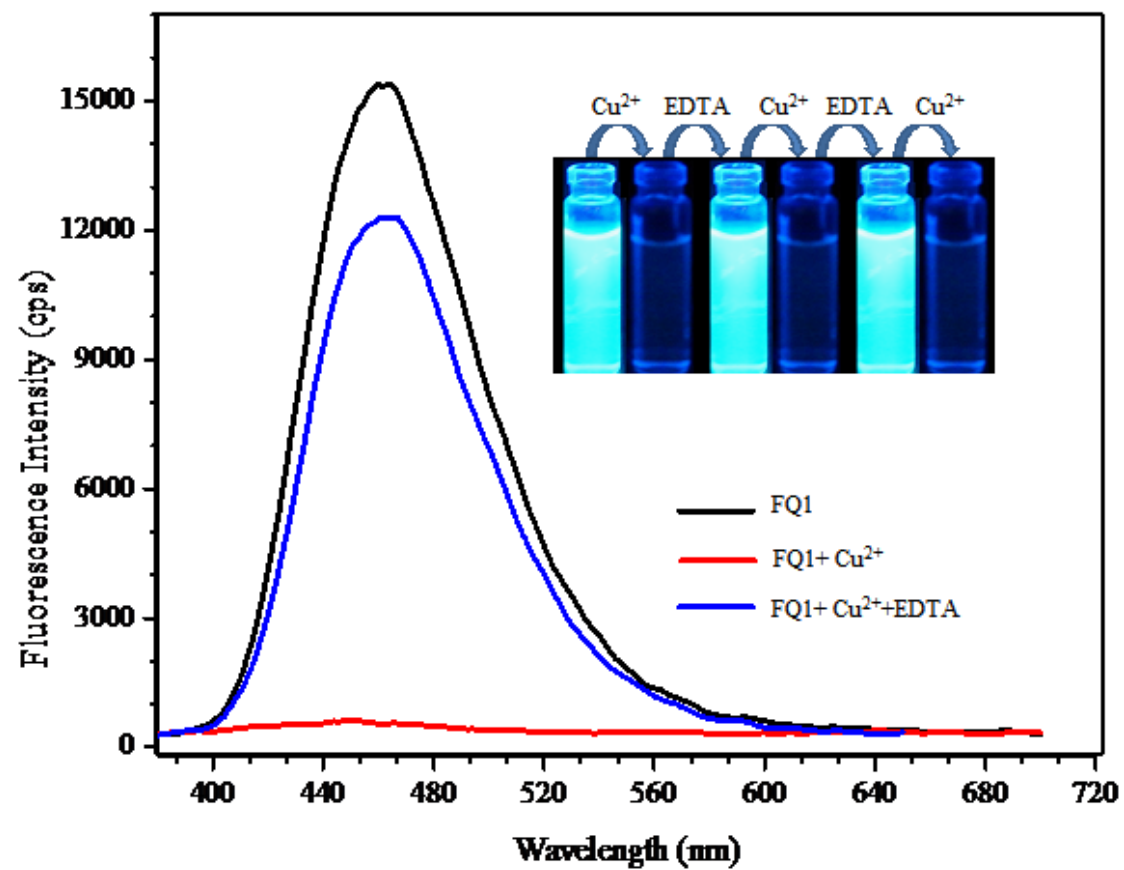



**Figure SS22: NMR Titration (FQ1) in the presence of different conc. of  $\text{Cu}^{2+}$  (DMSO- $d_6$  was used as NMR solvent and TMS as internal standard).**

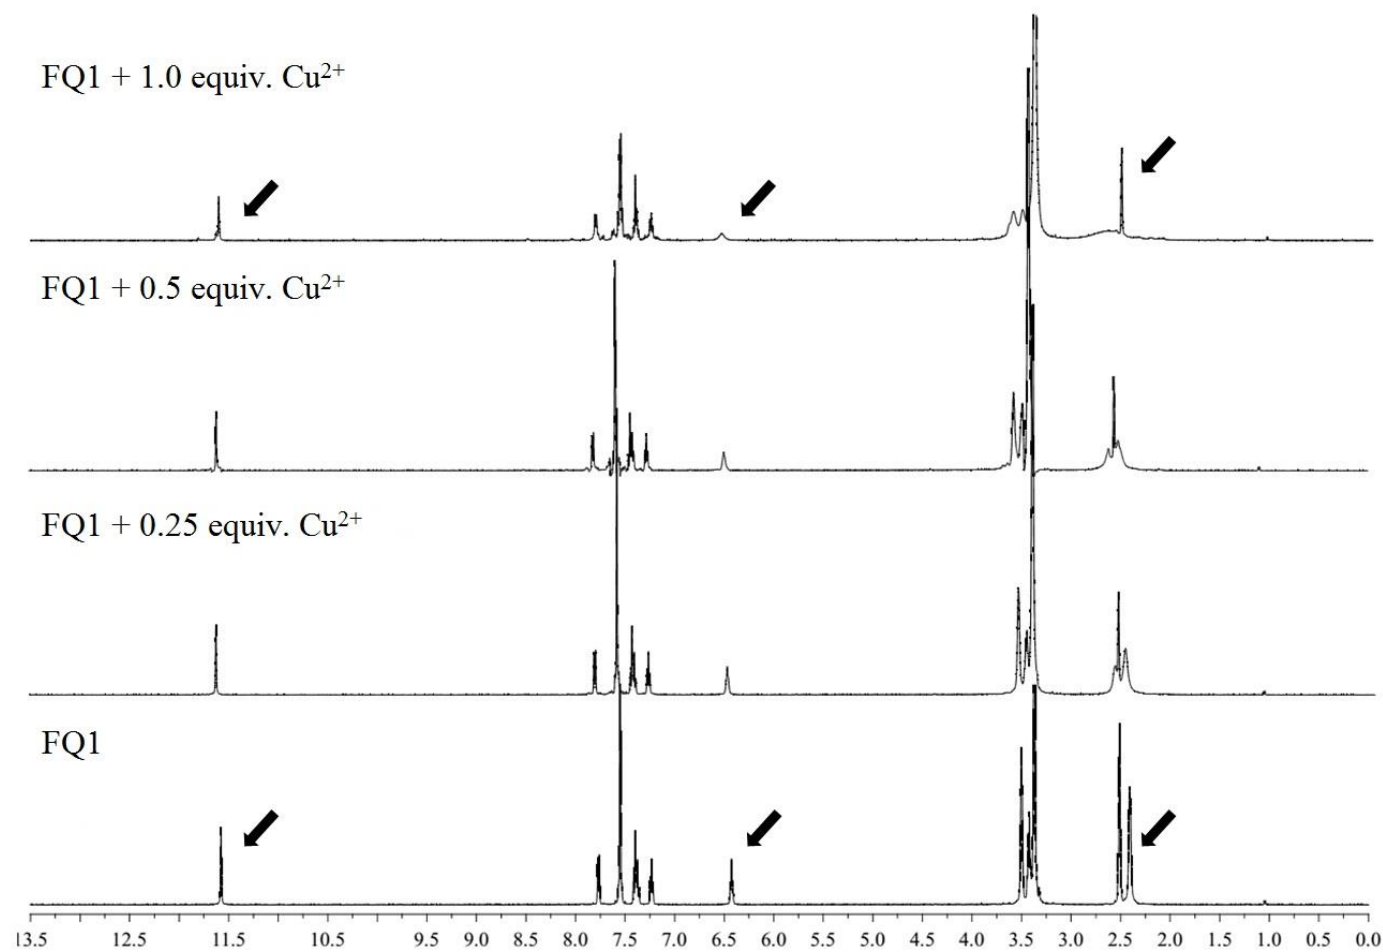

**Figure SS23: NMR Titration (FQ2) in the presence of different conc. of  $\text{Cu}^{2+}$  (DMSO- $\text{d}_6$  was used as NMR solvent and TMS as internal standard).**

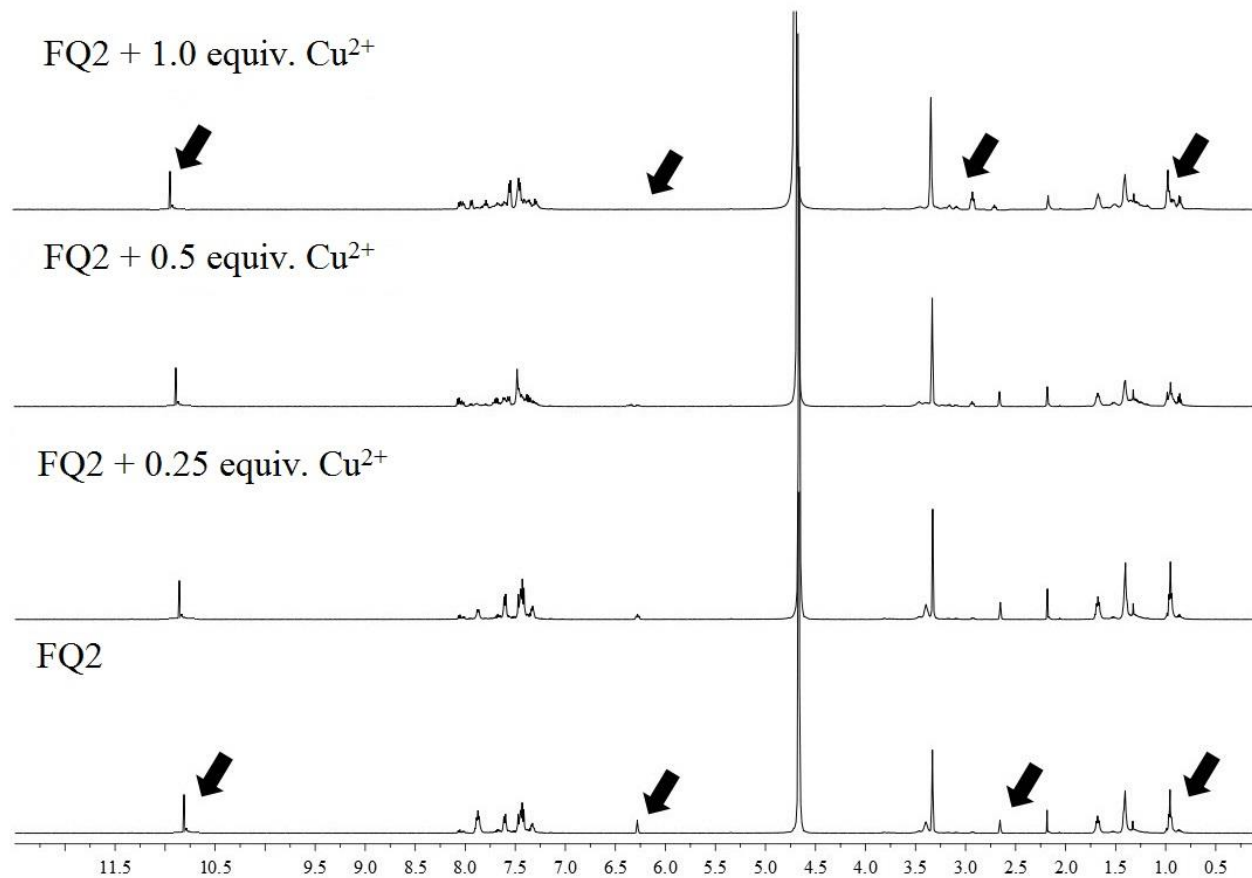

Figure SS24: Effect of pH on Fluorescence quenching

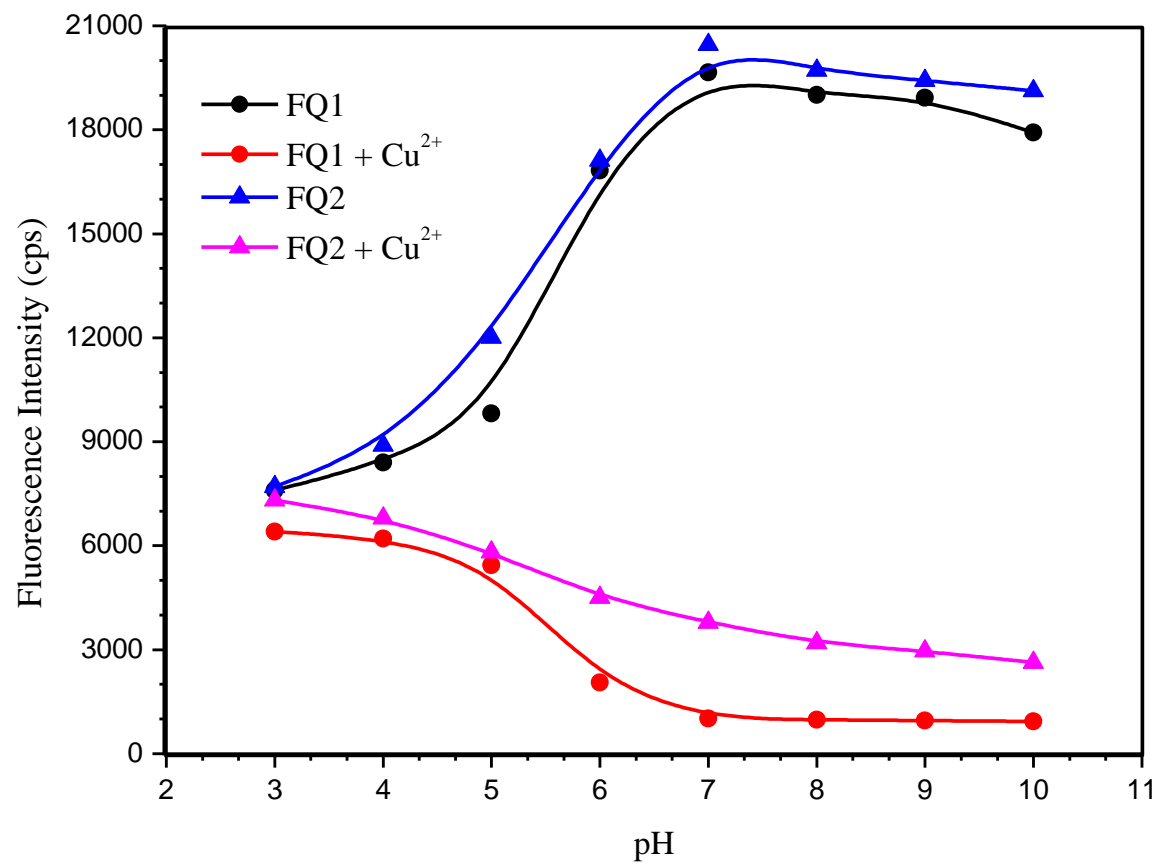

**Figure SS25: DFT study (Optimized structure of FQ1 and FQ2)**

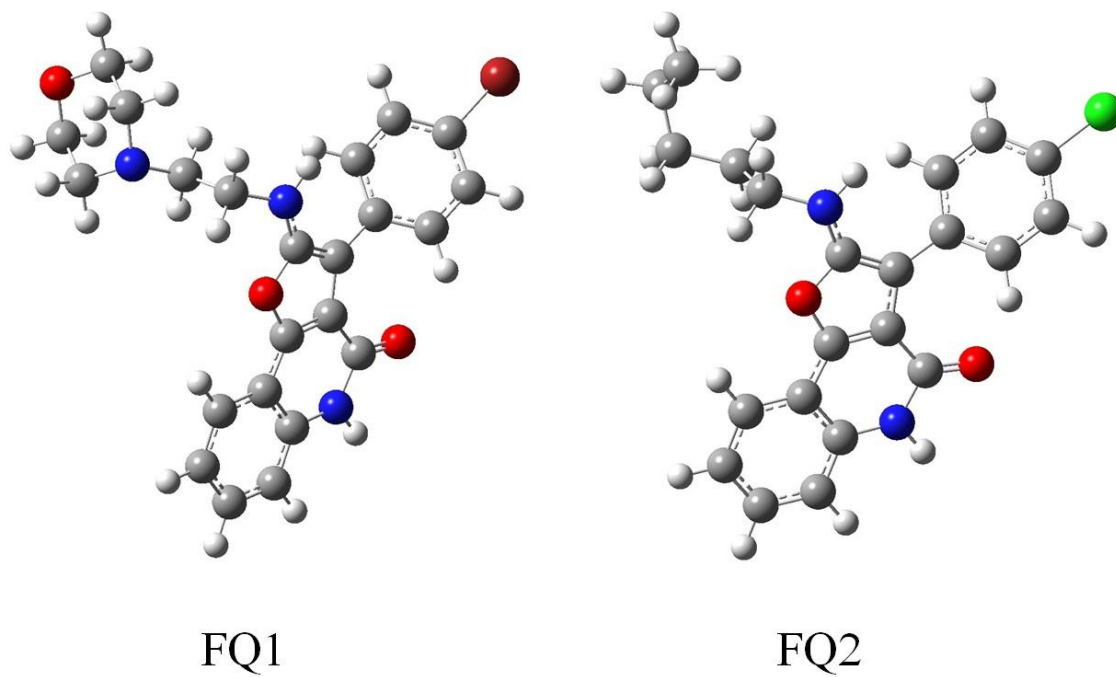

**Table SS1: Comparison of reported FQs with some of the recently developed sensors for Cu<sup>2+</sup>**

| S.No.           | Sensor/probe                                                                        | Interaction                           | Association constant (K <sub>a</sub> ) M <sup>-1</sup> | LOD in M                                                 | pH range      |
|-----------------|-------------------------------------------------------------------------------------|---------------------------------------|--------------------------------------------------------|----------------------------------------------------------|---------------|
| <b>1</b>        | <b>FQs (This work)</b>                                                              | <b>Turn off (flur)<br/>Reversible</b> | <b>2.11 × 10<sup>4</sup><br/>1.87 × 10<sup>4</sup></b> | <b>1.52 × 10<sup>-7</sup><br/>2.13 × 10<sup>-7</sup></b> | <b>5.5-11</b> |
| 2 <sup>4h</sup> | 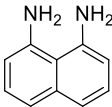   | Turn off (flur)<br>Irreversible       | NM                                                     | 0.5 × 10 <sup>-7</sup>                                   | 5-7           |
| 3 <sup>4i</sup> |    | Conc. dependent<br>Turn off (flur)    | 6.82 × 10 <sup>4</sup>                                 | 4.0 × 10 <sup>-7</sup>                                   | NM            |
| 4 <sup>8a</sup> | P-Qs                                                                                | Turn on (flur)<br>irreversible        | NM                                                     | 1.5 × 10 <sup>-6</sup>                                   | 7-9           |
| 6 <sup>4j</sup> |   | Turn on (flur)                        | 1.1 × 10 <sup>10</sup>                                 | 0.15 × 10 <sup>-6</sup>                                  | NM            |
| 7 <sup>4k</sup> |  | Turn off (flur)                       | NM                                                     | 1.27 × 10 <sup>-4</sup>                                  | NM            |
| 8 <sup>8b</sup> |  | Turn off (flur)                       | 5.0 × 10 <sup>4</sup>                                  | 1.5 × 10 <sup>-6</sup>                                   | 4-11          |

(flur = fluorescence, NM = Not Mentioned)

**Table S2: Photophysical properties of FQ1 and FQ2**

| Comp.                        | Emission          |                   | Quantum Yield | Detection Limit (M)   | Binding Constant ( $M^{-1}$ ) | $R^2$ | $I/I_0$ | Response Time (Min.) |
|------------------------------|-------------------|-------------------|---------------|-----------------------|-------------------------------|-------|---------|----------------------|
|                              | $\lambda_{ex}/nm$ | $\lambda_{em}/nm$ |               |                       |                               |       |         |                      |
| <b>FQ1</b>                   | 370               | 465               | 0.3915        | $1.52 \times 10^{-7}$ | $2.11 \times 10^4$            | 0.984 | 0.027   | 2-3 min.             |
| <b>FQ1 + Cu<sup>2+</sup></b> | 370               | 459               | 0.0253        |                       |                               |       |         |                      |
| <b>FQ2</b>                   | 370               | 460               | 0.3856        | $2.13 \times 10^{-7}$ | $1.87 \times 10^4$            | 0.985 | 0.159   | 2-3 min.             |
| <b>FQ + Cu<sup>2+</sup></b>  | 370               | 452               | 0.0597        |                       |                               |       |         |                      |
